# Supplementary material for: The synaptobrevin homologue Snc2p recruits the exocyst to secretory vesicles by binding to Sec6p
Source: PubMed Central journal article supplement — J Cell Biol. 2013 Aug 5;202(3):509–26. doi: 10.1083/jcb.201211148 (PMC3734085; doi:10.1083/jcb.201211148), 2013-08-05
Supplement: supp_jcb.201211148_JCB_201211148_sm.pdf [file supp_jcb.201211148_JCB_201211148_sm.pdf]

Shen et al., <http://www.jcb.org/cgi/content/full/jcb.201211148/DC1>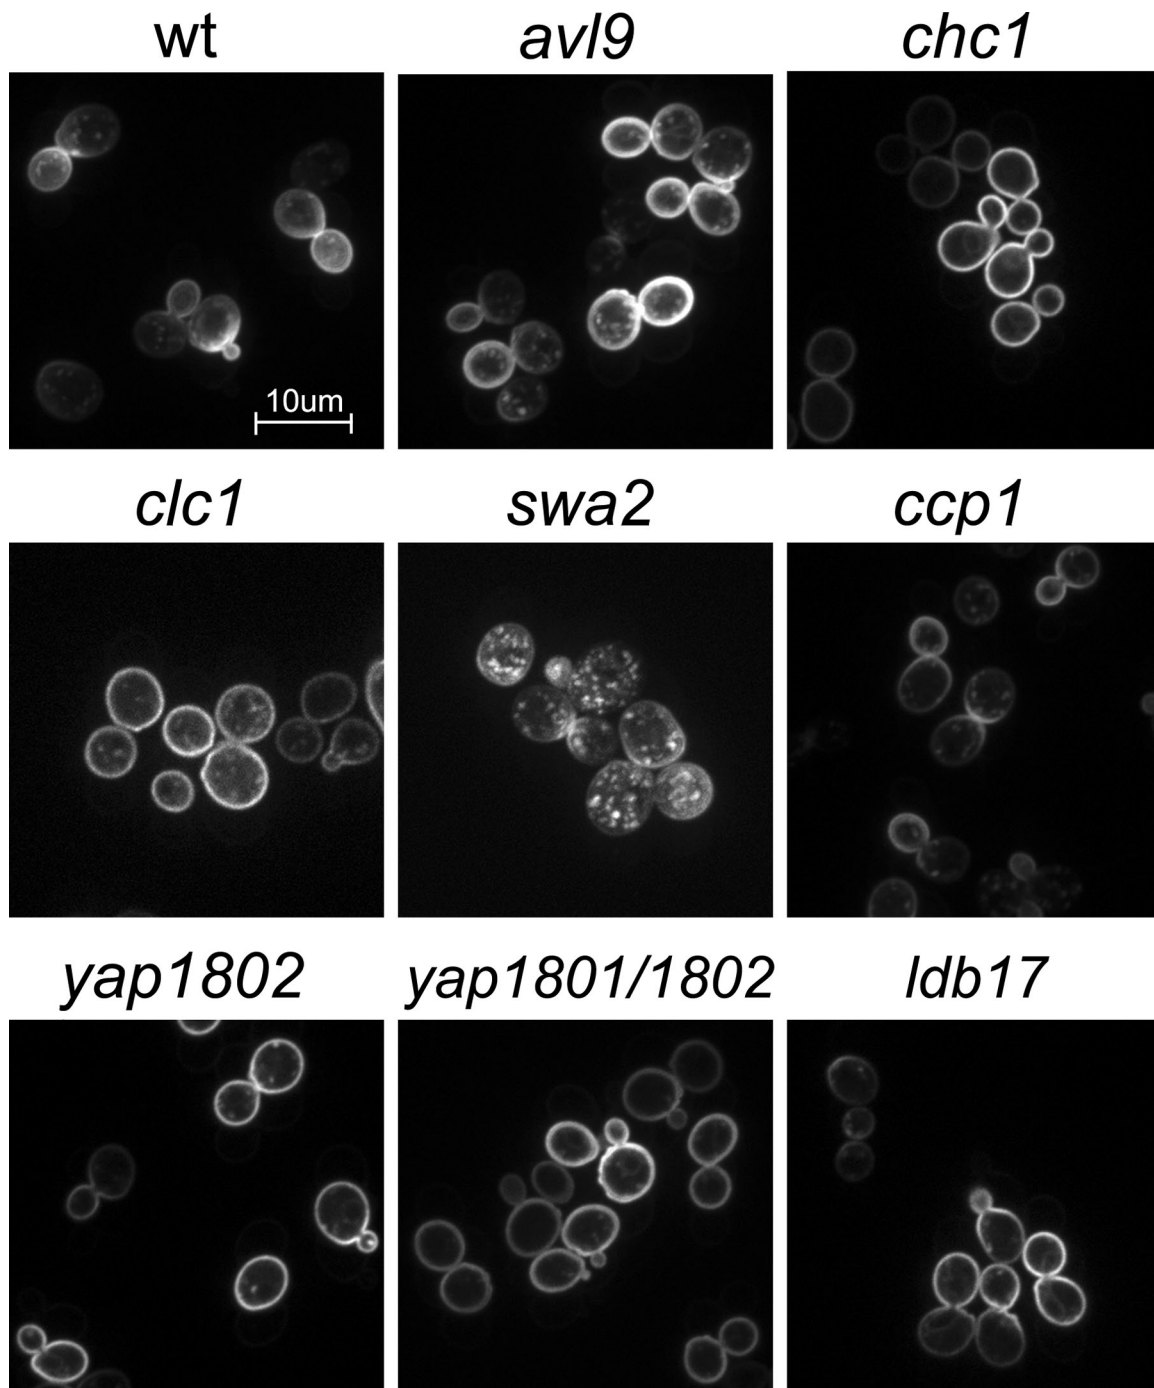

Figure S1. WT and mutant strains expressing GFP-Snc1p were imaged by fluorescence microscopy.

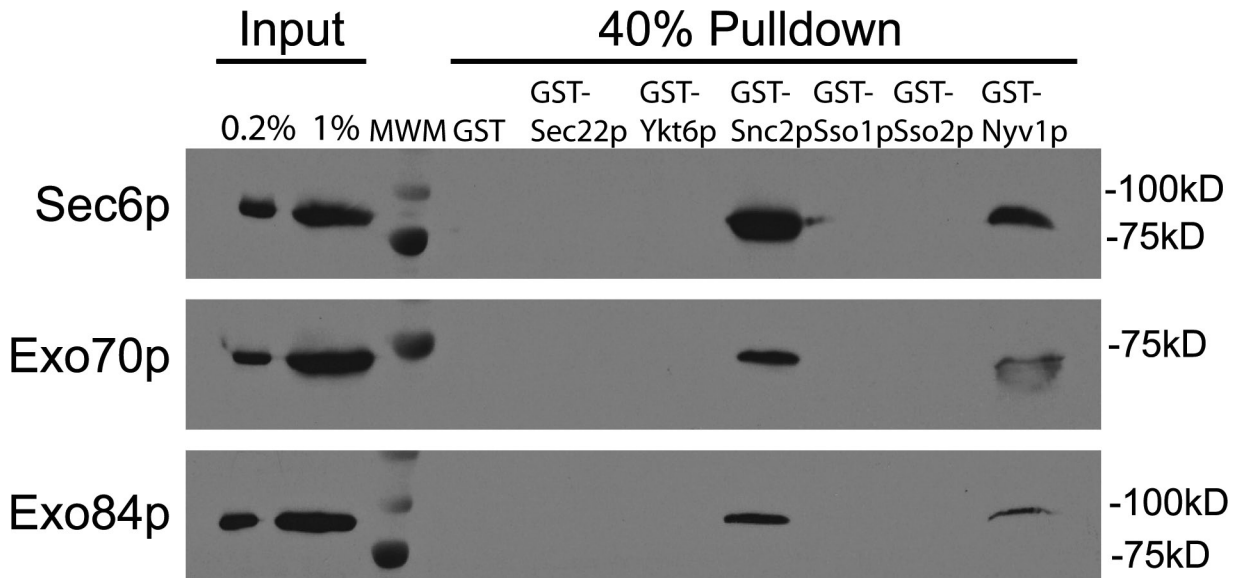

Figure S2. His-tagged Sec6p, Exo70p, and Exo84p were expressed in bacteria, purified and added to beads carrying GST, GST-Sec22p, GST-Ykt6p, GST-Snc2p, GST-Sso1p, GST-Sso2p, or GST-Nyv1p. The amount of GST-tagged protein was assessed by SDS-PAGE and Coomassie staining, using BSA as a standard. Based on this analysis, ~3 µg was added to each binding reaction. The beads were washed and the bound material was analyzed by immunoblot using anti-His antibody. The molecular weight marker is 75 kD.

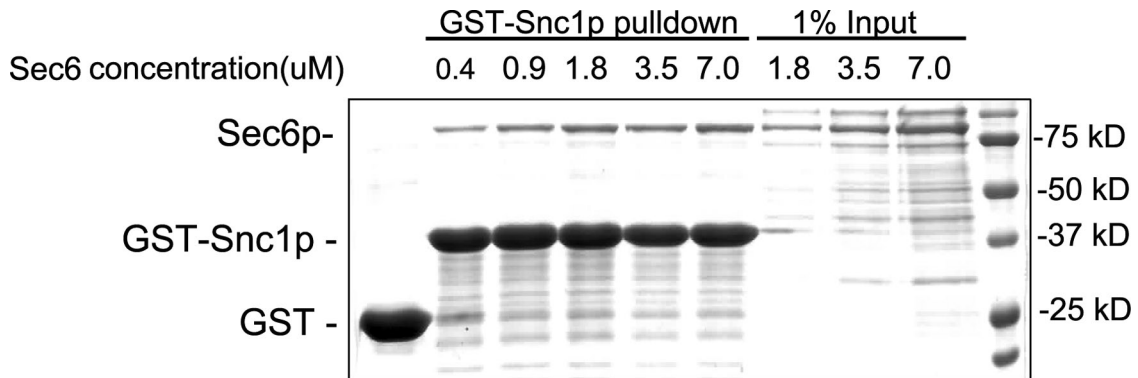

Figure S3. Purified his-tagged Sec6p was added at the indicated concentrations to beads carrying GST or GST-Snc1p. The beads were washed and the bound material was analyzed by SDS-PAGE and Coomassie staining.

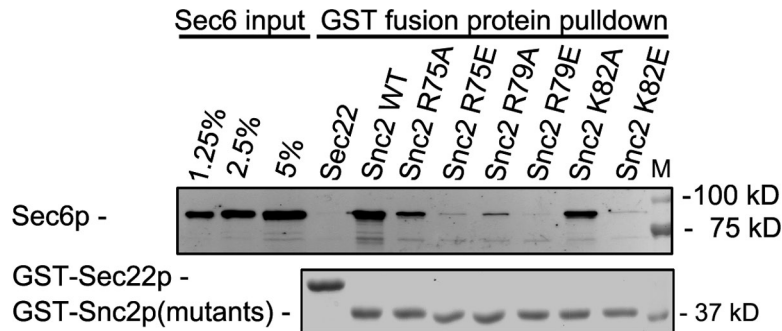

Figure S4. Purified his-tagged Sec6p was added to GST-Sec22p, GST-Snc2p wild type, or to the indicated GST-Snc2p mutants expressed in bacterial lysates. Glutathione beads were added, the beads were washed, and the bound material was analyzed by Western blot using anti-Sec6p antibody (top) and Coomassie staining (bottom).
